# Supplementary material
Source: PubMed Central journal article supplement (PMC3624376)
Supplement: JVI.02297-12_zjv999097461so1.pdf [file JVI.02297-12_zjv999097461so1.pdf]

1 **Supplementary materials include Supplementary Figure Legend, Figs S1-5 and**  
2 **Tables S1-3.**

3

4 **Supplementary Figure Legend**

5

6 **Figure S1.** SDS-PAGE analysis of recombinant HIV-1 Env gp140 proteins. HIV-1  
7 Env gp140 proteins as indicated on the top of gels were produced as described in  
8 the Methods section, loaded at 1ug per lane, fractionated on 4-20% gradient SDS-  
9 PAGE under non-reducing (Panel A) or reducing conditions (Panel B), and stained  
10 with Coomassie blue.

11

12 **Figure S2.** Blue native PAGE and Western blot analysis of HIV-1 gp140 Envs.  
13 HIV-1 Env gp140 proteins as indicated on the top of gels were fractionated on 4-  
14 20% gradient blue native PAGE (A), and detected in Western blots by mAbs 2F5  
15 (B), PG9 (C), CH31 (D) and 17B (E). Arrowheads indicate the monomeric,  
16 dimeric, trimeric and tetrameric forms of gp140.

17

18 **Figure S3.** IC<sub>50</sub> neutralization titers (vertical axis) for sera from individual guinea pigs  
19 received the indicated HIV-1 Envs (grouped into consensus, T/F and chronic families)  
20 were determined against a panel of subtype A, B, C and E pseudoviruses (horizontal  
21 axis). Panel (A) shows results for the conservative criterion, while panel (B) displays  
22 those from the inclusive approach. This figure mirrors Fig. 2 in the body of the text, but  
23 instead of including the geometric mean per group, each animal in each group is shown.

1

2 **Figure S4.** Alignment of the V3 loop amino acid sequences. Shown are alignment of the  
3 V3 loop amino acid sequences of HIV-1 Envs used for immunization and HIV-1 viruses  
4 used for neutralization assays. The alignment is relative to CON-S, and amino acids  
5 identical to CON-S are shown as dashes (-).

6

7 **Figure S5.** Levels and specificity of serum antibodies of immunized guinea pigs to HIV-  
8 1 Envs. Serum samples in serial 1:3 dilutions (1:30 to 1: 5314410) of immunized guinea  
9 pigs grouped by immunogens of consensus (red), chronic (blue), and T/F (green) were  
10 tested in ELISA for binding to clades B (A) and C (B) and group M consensus (C) V3  
11 peptides.. Pre-bleed sera was used as negative controls and showed no detectable binding  
12 to these peptides (data not shown). Serum binding antibody titers were expressed as  
13 EC50 (reciprocal serum dilutions) in y-axis. The open circles in each column represent  
14 the EC50 for each member of a group of animals immunized with the same immunogen;  
15 the filled circle represents the geometric mean of the group. This geometric mean score  
16 was used to represent each of the immunogens, for a statistically compare the classes of  
17 vaccines. The V3 responses were highly clade specific. For example, the sera from the  
18 chronic B vaccinated guinea pigs had a much higher levels of responses to the B.con  
19 peptide than C.con peptide, and vice versa for the chronic C vaccinated animals. Also,  
20 the T/F C clade responses were much more intense to the C clade V3 peptide than the B  
21 V3 clade peptide. Thus clade-specific effects confound a direct comparison of V3  
22 responses. To attempt to minimize clade effects, and to get the best estimate of total V3  
23 responses (given measurements were not done autologous V3 peptides), in (D) the

1 highest response for each vaccine to any of the 3 V3 peptides is shown. This was done to  
2 approximate the level of the V3 response, while minimizing the impact of sequence  
3 specificity. The median value of the geometric means is indicated by the horizontal bar.  
4 Vaccine classes (consensus, chronic, and T/F) were compared using a Kruskal-Wallis  
5 omnibus test. In this case the consensus immunogens had statistically higher levels of V3  
6 activity, however this result may also reflect sequence specificity to some degree, as the  
7 consensus sequences are more similar to each other than are the natural strains in the V3  
8 region (Fig. S4). Parts (E) and (F) show that within-clade V3 peptide reactivity correlated  
9 with the Tier-1 neutralization potency. In (E), the geometric mean of the 4 animals given  
10 each vaccine of the V3 B.con peptide response is compared to the geometric mean  
11 neutralization of the B clade Tier 1 pseudovirus SF162, and a highly significant rank  
12 correlation was observed ( $p = 0.008$ ). Similarly the V3 C.con peptide responses were  
13 significantly correlated with the neutralization of the C clade Tier 1 pseudovirus BR025  
14 ( $p=0.001$ ). The correlations between cross-clade V3 peptide responses and neutralization  
15 were either much diminished or lost (data not shown), presumably due to the clade/  
16 sequence specificity evident in (A-C). Tier 2 responses were not correlated with V3  
17 peptide responses.

18

19

Figure S1

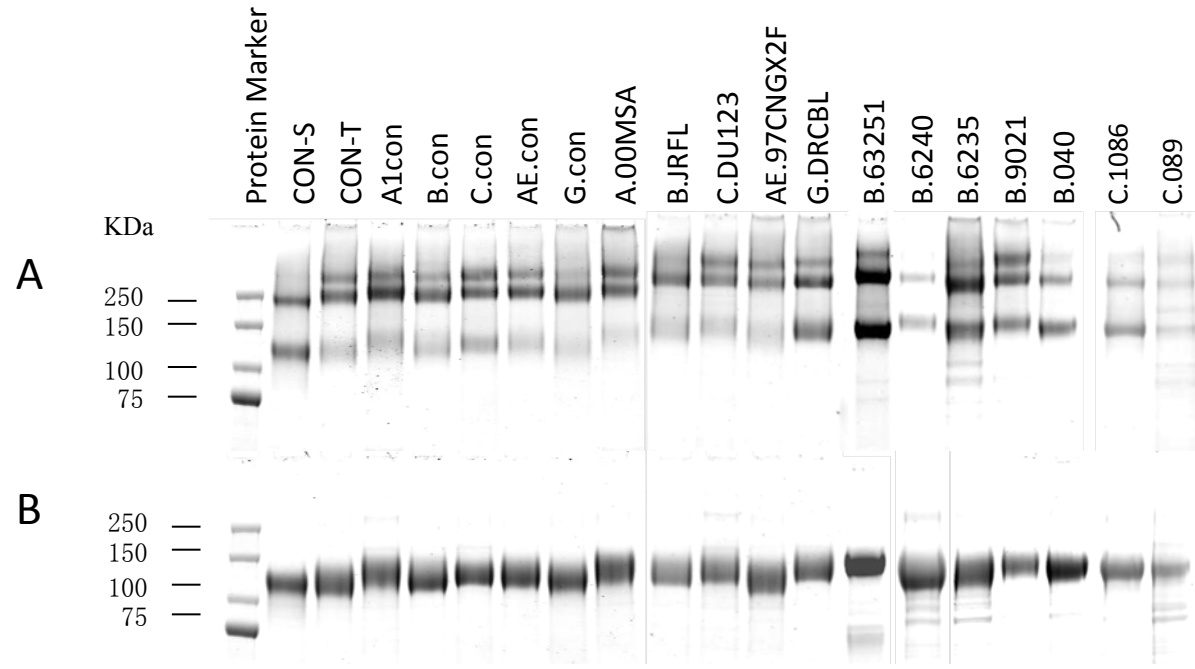

Figure S2

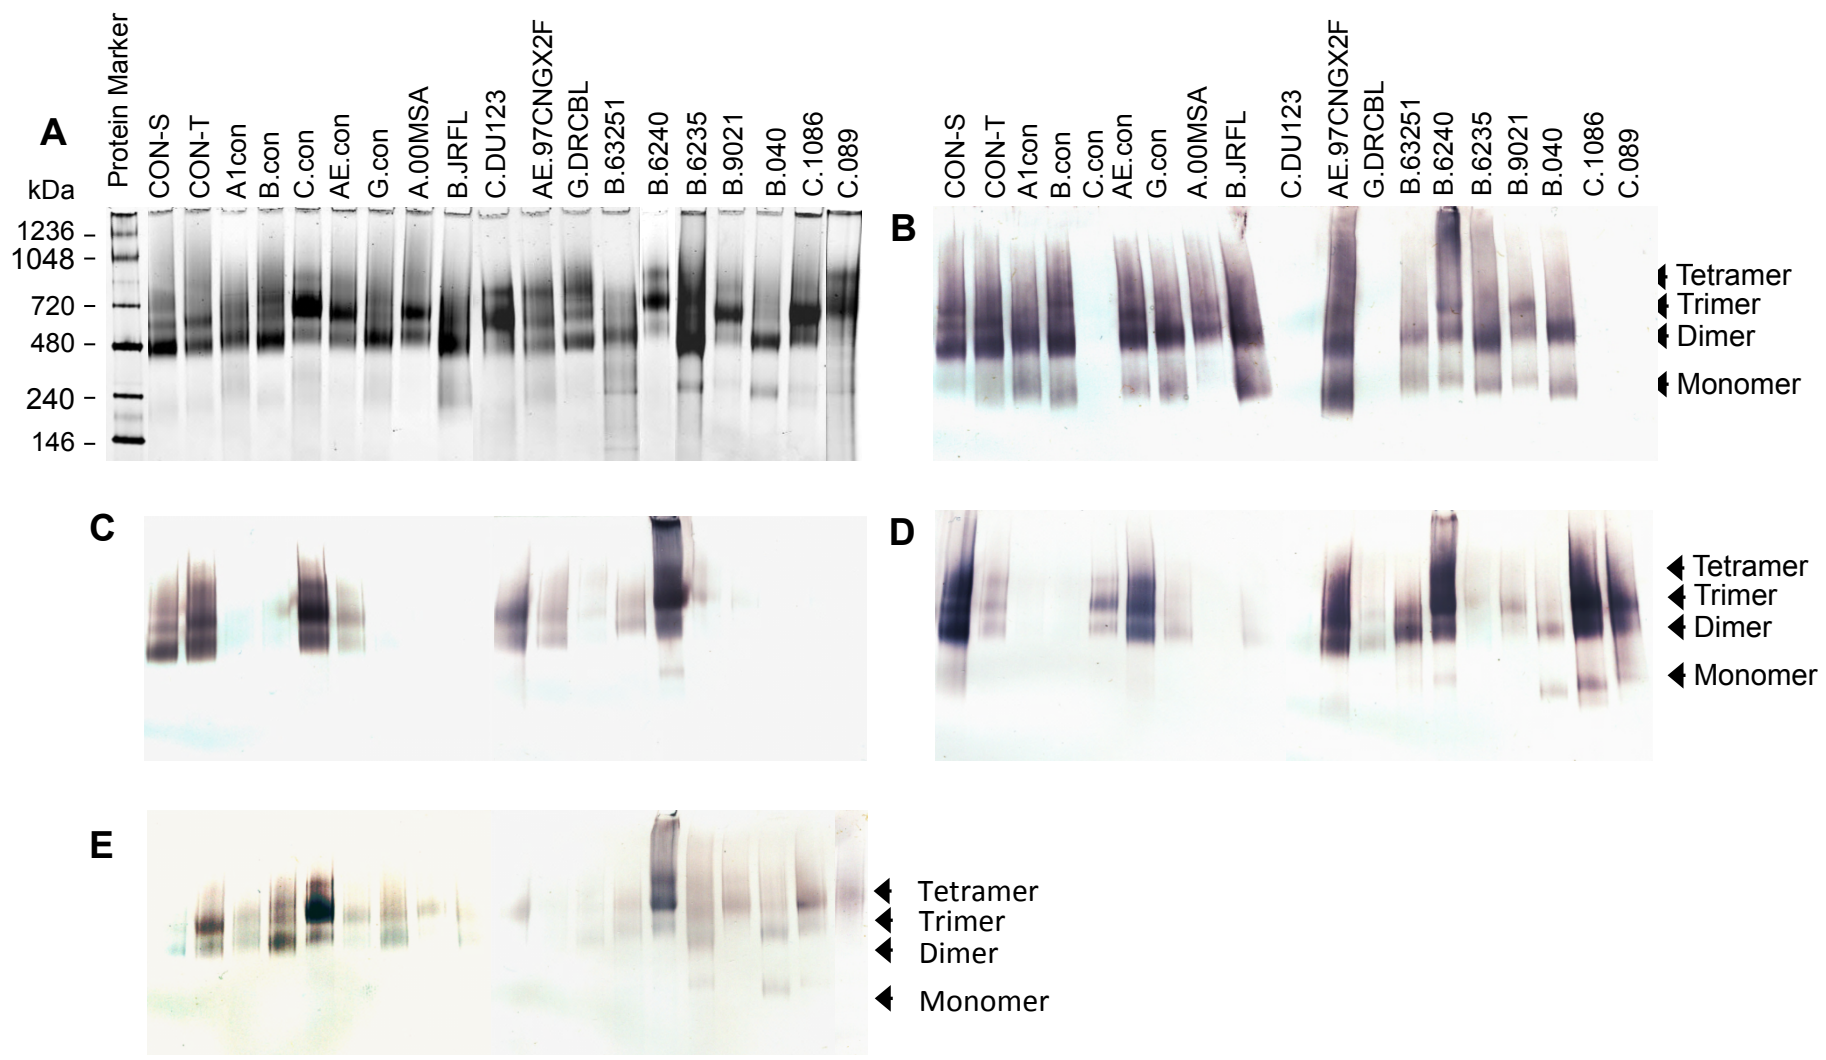

Figure S3

Traditional threshold

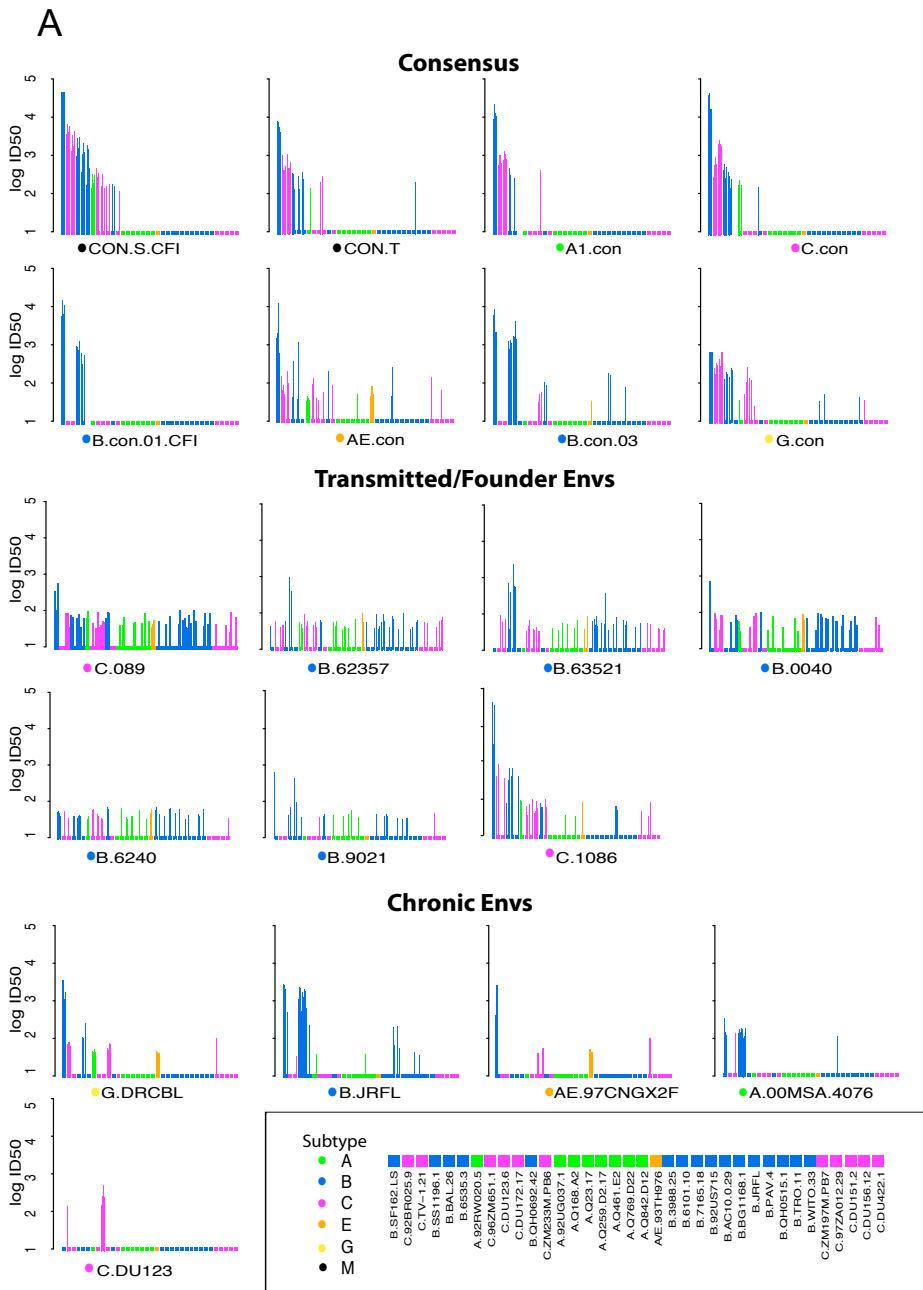

Inclusive threshold

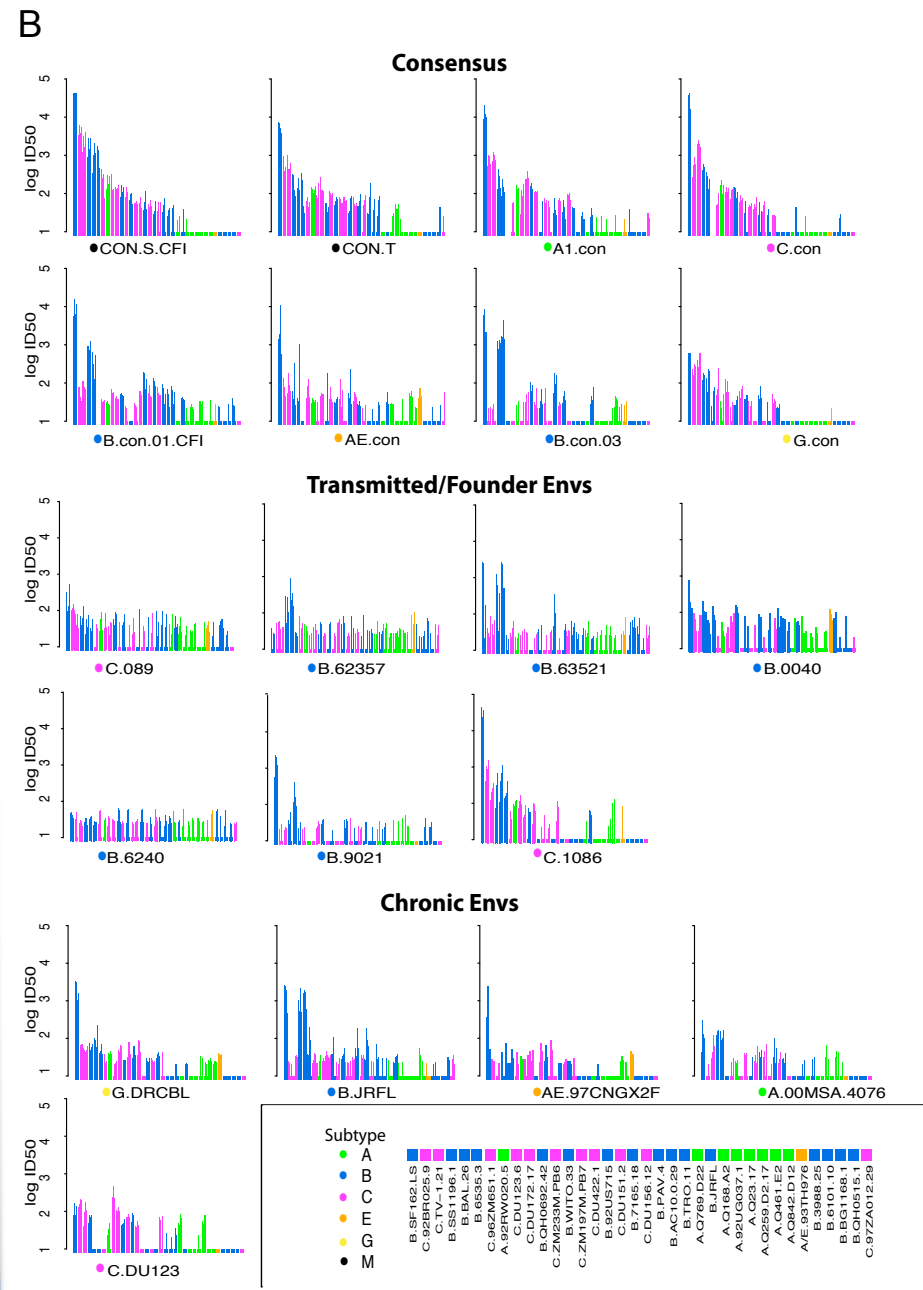

Figure S4

|                |            |            |            |     |                          |
|----------------|------------|------------|------------|-----|--------------------------|
| M.CON_S        | TRPNNNTRKS | IRIGPGQAFY | ATGDIIGDIR | QAH | } Consensus Immunogens   |
| M.CON_T        | -----      | -----      | -----      | --- |                          |
| A1.con         | -----      | -----      | -----      | --- |                          |
| B.con_01       | -----      | -H---R---  | T--E-----  | --- |                          |
| B.con_03       | -----      | -H---R---  | T--E-----  | --- |                          |
| C.Con          | -----      | -----      | T-----     | --- |                          |
| AE.Con         | ---S---T-  | -T-----V-- | R-----     | K-Y |                          |
| G.Con          | -----      | -----      | -----      | --- |                          |
| A.00MSA        | I--G-----  | VH-----    | -----      | --- | } Chronic Immunogens     |
| C.DU123        | -----      | -----TV-   | --N-----   | --- |                          |
| G.DRCBL        | -----R-    | VA-----    | T--EV----- | K-- |                          |
| AE.97CNGX2F    | ---S---T-  | -TM---V--  | R-----     | K-Y |                          |
| B.JRFL         | -----      | -H---R---  | T--E-----  | --- |                          |
| B.040          | -----      | -PM---K--- | -R---T---- | K-Y | } Transmitted Immunogens |
| B.63521        | -----      | -H---R---  | --E--N---  | --- |                          |
| B.62400        | -----G     | -H--L-R-L- | -----      | --- |                          |
| B.9021         | ---G-----  | -H-A--RT-- | --E-----   | R-- |                          |
| B.62357        | -----      | -H-----    | T--A-----  | --Y |                          |
| C.1086         | -----      | -----T-    | -----N--   | --- |                          |
| C.089          | I-----R-   | -----      | -ANG-V-N-- | --- |                          |
| B.QH0692.42    | ---G-----  | -H---R---  | -----      | --- | } Test Panel             |
| B.SS1196.1     | -----      | -H---R---  | ---GV----- | --- |                          |
| B.SF162.LS     | -----      | -T---R---  | -----      | --- |                          |
| B.Bal.26       | -----      | -H---R-L-  | T--E-----  | --- |                          |
| B.92US715      | -----      | -H---R---  | T--E-----  | --- |                          |
| B.JRFL-MC      | -----      | -H---R---  | T--E-----  | --- |                          |
| B.6101.10      | -----      | -HM--A--   | -R-EV----- | --- |                          |
| B.6535.3       | -----      | -NL--R---  | -----      | --- |                          |
| B.7165.18      | -----G     | -H---R---  | T--Q-----  | --- |                          |
| B.QH0515.1     | -----      | -H--A-K-L- | T--E-----  | --- |                          |
| B.3988.25      | -----      | -N--R-V    | --A-----   | --- |                          |
| B.BG1168.1     | E-----I--  | -HL---R-WH | --Q-----   | K-F |                          |
| B.AC10.0.29    | I-----G    | -H---R---  | T-----     | --- |                          |
| B.PVO.4        | -----      | -S---R---  | -----      | --- |                          |
| B.TRO.11       | -----R-    | -H---R---  | -----      | --- |                          |
| B.WITO.33      | ---G---R-  | -N---R---  | --A-----   | K-- |                          |
| C.TV1.21       | -----      | V-----     | --N-V----- | --- |                          |
| C.Du123.6      | -----      | -----TV-   | --N-----   | --- |                          |
| C.Du172.17     | ---S-----  | V-----T-F  | -----      | --- |                          |
| C.Du151.2      | -----R-    | -----T--   | --E--N---  | E-- |                          |
| C.Du156.12     | -----      | V-----T--  | -----      | --- |                          |
| C.Du422.1      | -----      | V-----T--  | --E-----   | E-- |                          |
| C.97ZA012.29   | -----      | M-----T--  | -----      | --Y |                          |
| C.96ZM651.2    | V-----Q-   | -----T--   | -----      | --- |                          |
| C.92BR025.9    | -----      | -----      | --E-----   | --- |                          |
| C.02ZM233M.PB6 | -----      | -----S--   | --E-V-N--  | E-- |                          |
| C.02ZM197M.PB7 | V-----G    | V-----T-F  | --E-----   | --- |                          |
| A.92RW020.05   | -----      | -G V-----  | --G-----   | --- |                          |
| A.92UG037.01   | -----R-    | V-----T--  | -----      | --- |                          |
| A.Q23.17       | I-----     | -----      | -----      | --- |                          |
| A.Q168.a2      | ---D---T-  | -----      | -----      | --Y |                          |
| A.Q259.d2.17   | -----      | V-----     | --D--N---  | --Y |                          |
| A.Q461.e2      | I--G-----  | V-----     | -----T---- | N-- |                          |
| A.Q769.d22     | ---G-----  | -HL---KV-- | -----      | K-- |                          |
| A.Q842.d12     | -----      | -H-----    | -----      | --- |                          |
| AE.93TH976     | ---ST---T- | -----V--   | R---T----  | K-Y |                          |

Figure S5

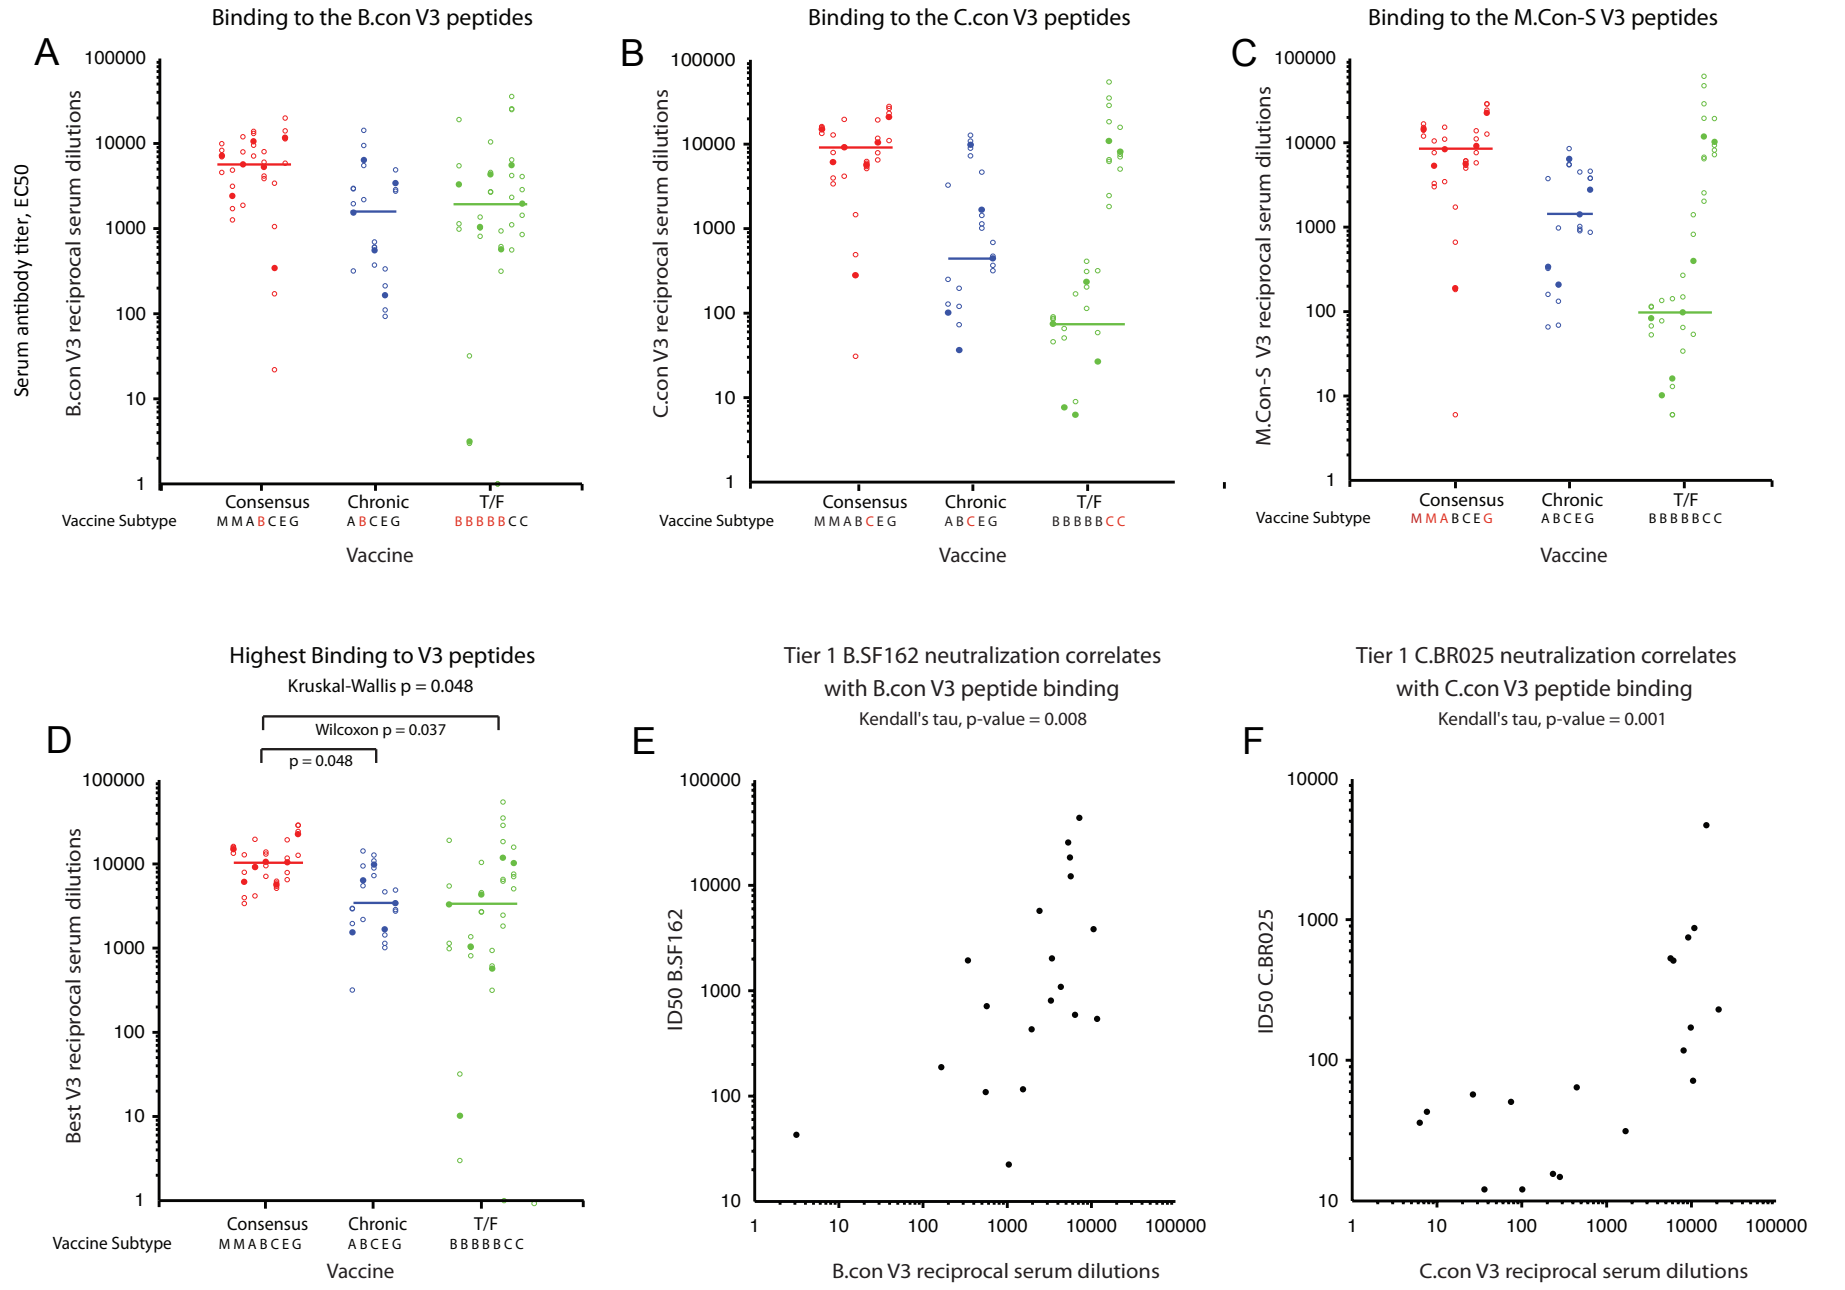



**Table S1.** HIV-1 Envs used in the study.

| Env name      | Env type  | Group/subtype | Construct design | Website /<br>accession No.                                    |
|---------------|-----------|---------------|------------------|---------------------------------------------------------------|
| CON-S_01      | Consensus | M             | gp140CFI         | <a href="http://hiv-web.lanl.gov">http://hiv-web.lanl.gov</a> |
| CON-T_03      | Consensus | M             | gp140CF          | <a href="http://hiv-web.lanl.gov">http://hiv-web.lanl.gov</a> |
| A.con         | Consensus | A             | gp140CF          | <a href="http://hiv-web.lanl.gov">http://hiv-web.lanl.gov</a> |
| B.con_01      | Consensus | B             | gp140CF          | <a href="http://hiv-web.lanl.gov">http://hiv-web.lanl.gov</a> |
| B.con_03      | Consensus | B             | gp140CF          | <a href="http://hiv-web.lanl.gov">http://hiv-web.lanl.gov</a> |
| C.con         | Consensus | C             | gp140CF          | <a href="http://hiv-web.lanl.gov">http://hiv-web.lanl.gov</a> |
| AE.con        | Consensus | CRF01_AE      | gp140CF          | <a href="http://hiv-web.lanl.gov">http://hiv-web.lanl.gov</a> |
| G.con         | Consensus | G             | gp140CF          | <a href="http://hiv-web.lanl.gov">http://hiv-web.lanl.gov</a> |
| A.00MSA       | Chronic   | A             | gp140CF          | AF457084                                                      |
| B.JRFL        | Chronic   | B             | gp140CF          | AAD14578                                                      |
| C.DU123       | Chronic   | C             | gp140CF          | ABD83628                                                      |
| AE01.97CNGX2F | Chronic   | CRF01_AE      | gp140CF          | AAG38897                                                      |
| G. DRCBL      | Chronic   | G             | gp140CF          | AAD14578                                                      |
| B.63521       | T/F       | B             | gp140C           | ACE64215                                                      |
| B.6240        | T/F       | B             | gp140C           | ACE65864                                                      |
| B.6235        | T/F       | B             | gp140C           | ABY50658                                                      |
| B.9021        | T/F       | B             | gp140C           | ABY50691                                                      |
| B.040         | T/F       | B             | gp140C           | ACR51151                                                      |
| C.1086        | T/F       | C             | gp140C,          | ACS67968                                                      |
| C.089         | T/F       | C             | gp140C           | ACO99154                                                      |

**Table S2.** Comparing mAb binding between T/F, consensus and chronic viruses.

| Antibody     | Comparison*         | p-value**     | fdr p-value*** | p-value**     | fdr p-value*** |
|--------------|---------------------|---------------|----------------|---------------|----------------|
|              |                     | ELISA         | ELISA          | SPR           | SPR            |
| <b>17b</b>   | Omnibus             | <b>0.0039</b> | <b>0.0234</b>  | <b>0.0055</b> | <b>0.0329</b>  |
| <b>17b</b>   | T/F x Chronic       | 0.0164        | 0.1477         | 0.0051        | 0.0909         |
| <b>17b</b>   | Chronic x Consensus | 0.2857        | 0.7347         | 0.1342        | 0.5966         |
| <b>17b</b>   | T/F x Consensus     | 0.0070        | 0.1259         | 0.0734        | 0.5966         |
| <b>2F5</b>   | Omnibus             | 0.6405        | 0.8682         | 0.2549        | 0.5101         |
| <b>2F5</b>   | T/F x Chronic       | 0.6098        | 0.9805         | 0.2424        | 0.5966         |
| <b>2F5</b>   | Chronic x Consensus | 0.3268        | 0.7354         | 0.8377        | 0.8869         |
| <b>2F5</b>   | T/F x Consensus     | 0.9726        | 0.9805         | 0.1690        | 0.5966         |
| <b>2G12</b>  | Omnibus             | 0.8682        | 0.8682         | 0.8450        | 0.8450         |
| <b>2G12</b>  | T/F x Chronic       | 0.7210        | 0.9805         | 0.9596        | 0.9596         |
| <b>2G12</b>  | Chronic x Consensus | 0.9307        | 0.9805         | 0.5065        | 0.8288         |
| <b>2G12</b>  | T/F x Consensus     | 0.6556        | 0.9805         | 0.8357        | 0.8869         |
| <b>4E10</b>  | Omnibus             | 0.1918        | 0.3836         | 0.6635        | 0.7962         |
| <b>4E10</b>  | T/F x Chronic       | 0.2172        | 0.6515         | 0.6818        | 0.8766         |
| <b>4E10</b>  | Chronic x Consensus | 0.8290        | 0.9805         | 0.4697        | 0.8288         |
| <b>4E10</b>  | T/F x Consensus     | 0.0921        | 0.4143         | 0.6084        | 0.8424         |
| <b>PG9</b>   | Omnibus             | 0.7771        | 0.8682         | 0.3401        | 0.5101         |
| <b>PG9</b>   | T/F x Chronic       | 0.6212        | 0.9805         | 0.3232        | 0.6465         |
| <b>PG9</b>   | Chronic x Consensus | 0.5498        | 0.9805         | 0.1558        | 0.5966         |
| <b>PG9</b>   | T/F x Consensus     | 0.9388        | 0.9805         | 0.8339        | 0.8869         |
| <b>VRC01</b> | Omnibus             | 0.0876        | 0.2629         | 0.3395        | 0.5101         |
| <b>VRC01</b> | T/F x Chronic       | 0.1604        | 0.5773         | 0.2652        | 0.5966         |
| <b>VRC01</b> | Chronic x Consensus | 0.9805        | 0.9805         | 0.2381        | 0.5966         |
| <b>VRC01</b> | T/F x Consensus     | 0.0332        | 0.1993         | 0.5618        | 0.8424         |

\*Statistical comparisons of the three distributions T/F, chronic and consensus were done using a Kruskal-Wallis omnibus test, followed by pair-wise comparisons using a Wilcoxon-rank order test.

\*\*p-value provides the uncorrected p-value for each comparison.

\*\*\*fdr: false discovery adjustment for multiple tests using the Benjamini-Hochberg method.



|             |        |       |      |      |    |      |    |     |    |    |    |     |    |    |    |    |
|-------------|--------|-------|------|------|----|------|----|-----|----|----|----|-----|----|----|----|----|
| B.JRFL      | GP1402 | 2558  | 968  | 1622 | 23 | 38   | 23 | 56  | 10 | 10 | 10 | 28  | 10 | 10 | 28 | 10 |
|             | GP1403 | 2261  | 561  | 1189 | 22 | 35   | 10 | 42  | 10 | 10 | 10 | 27  | 10 | 10 | 23 | 10 |
|             | GP1404 | 1342  | 299  | 1055 | 20 | 22   | 10 | 34  | 10 | 10 | 10 | 10  | 10 | 10 | 10 | 10 |
|             | GP791  | 1489  |      | 1893 | 32 |      | 17 |     |    |    | 20 |     |    |    |    | 32 |
|             | GP793  | 1888  |      | 1664 | 28 |      | 14 |     |    |    | 16 |     |    |    |    | 31 |
|             | GP796  | 79    |      |      | 34 |      | 18 |     |    |    | 18 |     |    |    |    | 22 |
|             | GP797  | 468   |      |      | 38 |      | 14 |     |    |    | 23 |     |    |    |    | 27 |
| C.DU123     | GP1623 | 51    | 48   | 10   | 10 | 10   | 21 | 10  | 10 | 10 | 10 | 10  | 10 | 10 | 10 | 10 |
|             | GP1624 | 126   | 78   | 10   | 10 | 10   | 10 | 10  | 10 | 10 | 10 | 10  | 10 | 10 | 53 | 10 |
|             | GP1625 | 49    | 71   | 10   | 10 | 10   | 10 | 10  | 10 | 10 | 10 | 10  | 10 | 10 | 84 | 10 |
|             | GP1626 | 131   | 77   | 30   | 10 | 10   | 10 | 10  | 10 | 10 | 10 | 10  | 10 | 10 | 63 | 10 |
| G.DRCBL     | GP1397 | 3295  | 75   | 99   | 21 | 40   | 47 | 22  | 10 | 10 | 10 | 29  | 10 | 10 | 29 | 10 |
|             | GP1398 | 3181  | 47   | 91   | 10 | 45   | 67 | 23  | 21 | 10 | 10 | 37  | 10 | 10 | 60 | 10 |
|             | GP1399 | 1029  | 58   | 57   | 22 | 67   | 83 | 31  | 10 | 10 | 10 | 40  | 10 | 10 | 60 | 10 |
|             | GP1401 | 1552  | 70   | 223  | 20 | 37   | 44 | 32  | 10 | 10 | 10 | 32  | 10 | 10 | 22 | 10 |
| A1.CON      | GP1300 | 650   | 54   | 61   | 24 |      | 10 | 30  | 25 | 10 | 10 | 32  | 44 | 10 | 72 | 10 |
|             | GP1301 | 650   | 338  | 237  | 42 |      | 25 | 77  | 32 | 10 | 10 | 67  | 41 | 40 | 83 | 10 |
|             | GP1302 | 650   | 382  | 238  | 28 |      | 10 | 38  | 22 | 10 | 10 | 43  | 26 | 10 | 10 | 10 |
|             | GP1303 | 650   | 226  | 95   | 10 |      | 10 | 27  | 22 | 10 | 10 | 21  | 42 | 10 | 64 | 10 |
| AE.CON      | GP1369 | 1339  | 60   | 24   | 21 |      | 26 | 54  | 10 | 23 | 10 | 21  | 10 | 10 | 22 | 10 |
|             | GP1370 | 1815  | 33   | 27   | 22 |      | 10 | 40  | 10 | 10 | 10 | 10  | 10 | 10 | 29 | 10 |
|             | GP1371 | 10598 | 1048 | 650  | 27 |      | 23 | 38  | 31 | 22 | 10 | 31  | 10 | 10 | 10 | 10 |
|             | GP1372 | 541   | 25   | 26   | 20 |      | 33 | 10  | 25 | 10 | 10 | 10  | 10 | 10 | 41 | 26 |
| B.CON.01    | GP1098 | 650   | 650  | 610  | 40 |      | 23 | 184 | 81 | 10 | 10 | 134 | 90 | 24 | 69 | 40 |
|             | GP1099 | 650   | 650  | 650  | 42 |      | 27 | 177 | 65 | 27 | 10 | 112 | 72 | 23 | 62 | 25 |
|             | GP1132 | 650   | 650  | 650  | 36 |      | 23 | 69  | 28 | 10 | 10 | 59  | 27 | 10 | 41 | 24 |
|             | GP980  | 650   | 650  | 650  | 35 |      | 20 | 126 | 55 | 10 | 10 | 83  | 51 | 10 | 65 | 10 |
| B.CON ENV03 | GP1389 | 6000  | 1145 | 1362 | 29 |      | 32 | 52  | 10 | 10 | 10 | 28  | 10 | 10 | 21 | 10 |
|             | GP1390 | 8407  | 498  | 1527 | 38 |      | 55 | 50  | 10 | 10 | 10 | 44  | 10 | 10 | 33 | 10 |
|             | GP1391 | 2082  | 1162 | 1414 | 34 |      | 92 | 92  | 10 | 10 | 10 | 52  | 10 | 10 | 67 | 10 |
|             | GP1392 | 1585  | 1076 | 1189 | 30 |      | 39 | 141 | 10 | 10 | 10 | 34  | 10 | 10 | 27 | 10 |
| C.CON       | GP1268 | 37634 | 402  | 356  | 43 |      | 10 | 27  | 10 | 10 | 10 | 28  | 10 | 10 | 30 | 10 |
|             | GP1269 | 41842 | 650  | 293  | 45 |      | 26 | 60  | 10 | 10 | 10 | 40  | 10 | 10 | 65 | 10 |
|             | GP1270 | 16225 | 253  | 134  | 10 |      | 10 | 10  | 10 | 10 | 10 | 10  | 10 | 10 | 10 | 10 |
|             | GP1271 | 16511 | 484  | 233  | 10 |      | 10 | 34  | 10 | 10 | 10 | 10  | 10 | 10 | 10 | 10 |
| G.CON       | GP1590 | 7003  | 83   | 92   | 10 | 84   | 10 | 31  |    | 29 | 10 | 23  | 40 | 10 |    | 10 |
|             | GP1591 | 2914  | 43   | 46   | 10 | 10   | 10 | 34  |    | 10 | 10 | 22  | 10 | 10 |    | 10 |
|             | GP1592 | 24916 | 217  | 224  | 10 | 168  | 10 | 51  |    | 21 | 10 | 46  | 10 | 10 |    | 10 |
|             | GP1597 | 20111 | 162  | 125  | 10 | 110  | 10 | 10  | 10 | 10 | 10 | 650 | 10 | 10 | 48 | 10 |
| CON-S       | GP963  | 39485 | 333  | 240  | 10 | 160  | 10 | 21  |    | 10 | 10 | 10  |    | 10 |    | 10 |
|             | GP964  | 27103 | 917  | 472  | 10 | 1734 | 10 | 34  |    | 10 | 10 | 10  |    | 10 |    | 10 |
|             | GP965  | 24895 | 723  | 760  | 10 | 1405 | 10 | 10  |    | 10 | 10 | 10  |    | 10 |    | 10 |
|             | GP966  | 44788 | 1183 | 727  | 10 | 452  | 10 | 21  |    | 10 | 10 | 10  |    | 10 |    | 10 |

|       |        |     |     |     |    |     |    |    |    |    |    |    |     |    |    |    |
|-------|--------|-----|-----|-----|----|-----|----|----|----|----|----|----|-----|----|----|----|
| CON-T | GP1156 | 650 | 322 | 142 | 10 | 349 | 53 | 30 | 10 | 10 | 10 | 46 | 31  | 10 | 50 | 10 |
|       | GP1162 | 650 | 300 | 260 | 10 | 226 | 39 | 34 | 25 | 10 | 10 | 48 | 29  | 10 | 65 | 10 |
|       | GP1163 | 650 | 120 | 120 | 10 | 48  | 40 | 77 | 68 | 10 | 10 | 62 | 83  | 10 | 81 | 44 |
|       | GP1164 | 650 | 88  | 54  | 10 | 31  | 53 | 84 | 86 | 10 | 10 | 98 | 188 | 10 | 70 | 43 |

| Immunogen   | Neutralization titer, ID50 (reciprocal serum dilution), clade C |         |         |         |       |       |       |       |       |        |         |  |
|-------------|-----------------------------------------------------------------|---------|---------|---------|-------|-------|-------|-------|-------|--------|---------|--|
|             | TV-1                                                            | 92BR025 | 96ZM651 | 97ZA012 | DU172 | DU151 | DU156 | DU422 | DU123 | ZM197M | ZM233M6 |  |
| B.0040      | 169                                                             | 96      | 262     | 142     | 186   | 239   | 10    | 43    | 27    | 10     | 10      |  |
|             | 82                                                              | 64      | 89      | 141     | 96    | 504   | 71    | 216   | 39    | 10     | 10      |  |
|             | 82                                                              | 30      | 42      | 64      | 96    | 161   | 34    | 10    | 10    | 10     | 10      |  |
| B.62357     | 36                                                              | 52      | 82      | 49      | 40    | 83    | 28    | 53    | 24    | 10     | 22      |  |
|             | 10                                                              | 10      | 10      | 10      | 10    | 22    | 10    | 10    | 10    | 10     | 10      |  |
|             | 40                                                              | 56      | 37      | 94      | 49    | 104   | 36    | 54    | 10    | 27     | 28      |  |
|             | 39                                                              | 57      | 52      | 46      | 34    | 172   | 30    | 67    | 27    | 23     | 26      |  |
| B.6240      | 25                                                              | 32      | 23      | 25      | 32    | 59    | 20    | 26    | 20    | 10     | 23      |  |
|             | 31                                                              | 48      | 52      | 209     | 30    | 174   | 61    | 146   | 40    | 27     | 28      |  |
|             | 29                                                              | 50      | 55      | 244     | 29    | 201   | 37    | 205   | 35    | 23     | 25      |  |
|             | 21                                                              | 44      | 10      | 10      | 10    | 56    | 29    | 10    | 10    | 10     | 10      |  |
| B.63521     | 53                                                              | 40      | 30      | 49      | 38    | 180   | 33    | 10    | 25    | 10     | 21      |  |
|             | 21                                                              | 29      | 22      | 21      | 42    | 104   | 24    | 10    | 10    | 10     | 10      |  |
|             | 25                                                              | 66      | 40      | 25      | 79    | 158   | 35    | 31    | 34    | 10     | 27      |  |
|             | 65                                                              | 85      | 62      | 46      | 115   | 126   | 33    | 36    | 31    | 26     | 32      |  |
| B.9021      | 20                                                              | 21      | 21      | 10      | 22    | 111   | 26    | 10    | 10    | 10     | 10      |  |
|             | 10                                                              | 10      | 10      | 10      | 25    | 148   | 10    | 10    | 10    | 10     | 10      |  |
|             | 24                                                              | 28      | 24      | 10      | 34    | 50    | 21    | 10    | 10    | 10     | 10      |  |
|             | 23                                                              | 10      | 10      | 10      | 28    | 53    | 24    | 10    | 10    | 10     | 10      |  |
| C.089       | 81                                                              | 104     | 34      | 30      | 38    | 63    | 10    | 22    | 31    | 10     | 10      |  |
|             | 41                                                              | 118     | 42      | 103     | 21    | 413   | 24    | 25    | 32    | 10     | 31      |  |
|             | 79                                                              | 146     | 94      | 127     | 49    | 463   | 84    | 62    | 84    | 41     | 49      |  |
|             | 144                                                             | 106     | 127     | 36      | 46    | 150   | 10    | 25    | 34    | 10     | 10      |  |
| C.1086      | 106                                                             | 111     | 131     | 102     | 52    | 260   | 35    | 157   | 57    | 10     | 42      |  |
|             | 125                                                             | 114     | 209     | 175     | 91    | 254   | 63    | 178   | 77    | 25     | 66      |  |
|             | 397                                                             | 200     | 290     | 39      | 99    | 169   | 20    | 27    | 125   | 10     | 28      |  |
|             | 156                                                             | 186     | 217     | 169     | 126   | 471   | 30    | 154   | 180   | 10     | 82      |  |
|             | 119                                                             | 403     | 10      | 10      | 40    | 10    | 10    | 10    | 71    | 21     | 27      |  |
|             | 196                                                             | 1028    | 62      | 10      | 46    | 32    | 10    | 10    | 118   | 10     | 102     |  |
|             | 255                                                             | 880     | 10      | 10      | 86    | 117   | 10    | 20    | 170   | 10     | 97      |  |
|             | 365                                                             | 1561    | 36      | 10      | 53    | 79    | 10    | 26    | 96    | 46     | 59      |  |
| A.00MSA     | 22                                                              | 10      | 10      | 10      | 26    | 22    | 10    | 10    | 36    | 34     | 27      |  |
|             | 23                                                              | 10      | 23      | 10      | 25    | 22    | 10    | 10    | 28    | 10     | 10      |  |
|             | 25                                                              | 10      | 10      | 10      | 10    | 10    | 10    | 10    | 25    | 10     | 22      |  |
|             | 10                                                              | 43      | 30      | 10      | 83    | 26    | 10    | 20    | 35    | 70     | 10      |  |
| AE.97CNGX2F | 10                                                              | 61      | 10      | 10      | 92    | 10    | 10    | 10    | 28    | 10     | 23      |  |
|             | 67                                                              | 93      | 44      | 10      | 191   | 22    | 30    | 10    | 21    | 79     | 72      |  |
|             | 60                                                              | 136     | 24      | 10      | 115   | 24    | 10    | 10    | 61    | 74     | 73      |  |

|          |      |      |     |    |     |    |     |    |     |    |     |
|----------|------|------|-----|----|-----|----|-----|----|-----|----|-----|
|          | 28   | 66   | 21  | 10 | 122 | 23 | 10  | 10 | 36  | 45 | 46  |
|          | 10   | 25   | 10  | 10 | 45  | 10 | 10  | 25 | 24  | 23 | 23  |
|          | 10   | 21   | 10  | 10 | 36  | 10 | 10  | 10 | 25  | 10 | 21  |
|          | 10   | 22   | 27  | 10 | 29  | 10 | 10  | 10 | 10  | 10 | 10  |
| B.JRFL   | 33   | 11   | 40  | 28 | 31  | 35 | 24  | 31 | 29  | 23 | 20  |
|          | 32   | 14   | 38  | 19 | 25  | 30 | 19  | 27 | 24  | 22 | 14  |
|          | 35   | 21   | 38  | 36 | 30  | 36 | 13  | 22 | 34  | 9  | 21  |
|          | 31   | 18   | 22  | 20 | 36  | 25 | 23  | 28 | 26  | 6  | 29  |
|          | 41   | 107  | 10  | 10 | 35  | 24 | 69  | 10 | 170 | 26 | 33  |
| C.DU123  | 94   | 152  | 10  | 10 | 75  | 24 | 57  | 10 | 231 | 29 | 49  |
|          | 180  | 204  | 10  | 10 | 99  | 43 | 10  | 10 | 458 | 41 | 76  |
|          | 105  | 203  | 10  | 10 | 115 | 10 | 75  | 10 | 226 | 48 | 72  |
|          | 42   | 122  | 10  | 10 | 79  | 23 | 10  | 10 | 55  | 30 | 31  |
| G.DRCBL  | 44   | 274  | 39  | 10 | 148 | 26 | 44  | 10 | 64  | 89 | 79  |
|          | 88   | 267  | 10  | 10 | 142 | 22 | 10  | 10 | 85  | 84 | 80  |
|          | 62   | 126  | 10  | 10 | 102 | 24 | 10  | 10 | 38  | 44 | 33  |
|          | 650  | 210  | 10  | 27 | 241 | 69 | 97  | 63 | 29  | 78 | 112 |
| A1.CON   | 650  | 995  | 55  | 31 | 237 | 78 | 89  | 43 | 106 | 58 | 119 |
|          | 650  | 985  | 59  | 30 | 389 | 64 | 105 | 10 | 47  | 10 | 108 |
|          | 650  | 594  | 10  | 23 | 251 | 62 | 69  | 10 | 57  | 66 | 113 |
|          | 37   | 179  | 31  | 10 | 36  | 29 | 21  | 10 | 85  | 37 | 36  |
| AE.CON   | 174  | 106  | 57  | 10 | 52  | 34 | 10  | 10 | 43  | 93 | 72  |
|          | 85   | 156  | 120 | 55 | 120 | 51 | 10  | 10 | 39  | 10 | 35  |
|          | 27   | 71   | 22  | 25 | 88  | 26 | 25  | 10 | 50  | 69 | 40  |
|          | 112  | 76   | 36  | 10 | 40  | 52 | 74  | 59 | 67  | 29 | 24  |
| B.CON.01 | 109  | 75   | 30  | 10 | 43  | 87 | 53  | 60 | 63  | 26 | 21  |
|          | 78   | 42   | 33  | 10 | 38  | 43 | 48  | 40 | 53  | 23 | 10  |
|          | 67   | 32   | 34  | 10 | 38  | 42 | 46  | 47 | 56  | 10 | 10  |
|          | 20   | 66   | 10  | 10 | 38  | 24 | 10  | 10 | 32  | 29 | 26  |
| B.CON 03 | 27   | 64   | 10  | 10 | 164 | 26 | 10  | 10 | 34  | 31 | 10  |
|          | 10   | 107  | 10  | 10 | 127 | 30 | 10  | 10 | 47  | 68 | 71  |
|          | 10   | 46   | 10  | 10 | 131 | 28 | 10  | 10 | 29  | 10 | 22  |
|          | 2029 | 276  | 10  | 10 | 70  | 33 | 34  | 32 | 107 | 27 | 49  |
| C.CON    | 2547 | 546  | 149 | 10 | 121 | 50 | 85  | 51 | 150 | 64 | 100 |
|          | 1933 | 908  | 10  | 10 | 128 | 64 | 85  | 40 | 108 | 21 | 87  |
|          | 1699 | 578  | 10  | 10 | 152 | 10 | 78  | 46 | 136 | 10 | 96  |
|          | 303  | 232  | 149 |    | 131 | 31 | 25  | 50 | 59  | 21 | 62  |
| G.CON    | 153  | 199  | 96  |    | 147 | 40 | 29  | 79 | 46  | 21 | 40  |
|          | 650  | 374  | 136 |    | 129 | 30 | 38  | 44 | 86  | 22 | 82  |
|          | 416  | 255  | 87  | 10 | 122 | 27 | 38  | 10 | 67  | 26 | 58  |
|          | 1332 | 3438 | 28  |    | 45  | 10 | 35  | 26 | 101 | 27 | 51  |
| CON-S    | 1747 | 4793 | 69  |    | 38  | 10 | 59  | 26 | 191 | 10 | 54  |
|          | 1345 | 650  | 318 |    | 31  | 10 | 10  | 81 | 137 | 64 | 27  |
|          | 2801 | 9919 | 74  |    | 41  | 10 | 61  | 23 | 132 | 22 | 50  |
| CON-T    | 650  | 940  | 62  | 10 | 269 | 79 | 10  | 83 | 115 | 82 | 118 |

|     |     |    |    |     |    |    |    |    |    |     |
|-----|-----|----|----|-----|----|----|----|----|----|-----|
| 355 | 377 | 80 | 26 | 121 | 52 | 50 | 82 | 71 | 71 | 105 |
| 273 | 384 | 45 | 10 | 126 | 46 | 69 | 64 | 74 | 57 | 94  |
| 332 | 496 | 60 | 10 | 115 | 58 | 90 | 69 | 73 | 57 | 103 |

| Immunogen   | Neutralization titer, ID50 (reciprocal serum dilution), clade A |      |       |         |      |         |      |      |      |        | Control<br>MuLV |
|-------------|-----------------------------------------------------------------|------|-------|---------|------|---------|------|------|------|--------|-----------------|
|             | Q23                                                             | Q259 | Q4612 | 93TH976 | Q769 | 92RW020 | Q168 | AC10 | Q842 | QH0692 |                 |
| B.0040      | 266                                                             | 368  | 540   | 119     | 109  | 55      | 79   | 69   | 28   | 158    | 35              |
|             | 493                                                             | 540  | 540   | 90      | 94   | 30      | 161  | 63   | 30   | 138    | 26              |
|             | 214                                                             | 328  | 448   | 61      | 67   | 22      | 26   | 63   | 10   | 97     | 30              |
| B.62357     | 243                                                             | 201  | 267   | 87      | 68   | 49      | 48   | 10   | 29   | 119    | 31              |
|             | 10                                                              | 21   | 33    | 10      | 10   | 10      | 10   | 10   | 10   | 10     | 10              |
|             | 127                                                             | 156  | 202   | 49      | 88   | 42      | 38   | 20   | 10   | 55     | 32              |
|             | 207                                                             | 242  | 386   | 102     | 57   | 32      | 53   | 34   | 10   | 49     | 28              |
| B.6240      | 131                                                             | 257  | 56    | 10      | 52   | 10      | 20   | 115  | 10   | 29     | 10              |
|             | 477                                                             | 321  | 462   | 44      | 108  | 30      | 60   | 69   | 29   | 64     | 23              |
|             | 428                                                             | 406  | 540   | 57      | 134  | 35      | 83   | 42   | 30   | 57     | 25              |
|             | 10                                                              | 28   | 10    | 10      | 10   | 10      | 10   | 28   | 10   | 27     | 10              |
| B.63521     | 107                                                             | 444  | 415   | 33      | 36   | 22      | 10   | 31   | 10   | 134    | 23              |
|             | 26                                                              | 25   | 21    | 10      | 23   | 10      | 10   | 20   | 10   | 97     | 10              |
|             | 49                                                              | 46   | 25    | 25      | 29   | 21      | 21   | 28   | 10   | 124    | 23              |
|             | 190                                                             | 122  | 118   | 78      | 62   | 29      | 32   | 10   | 27   | 138    | 26              |
| B.9021      | 76                                                              | 79   | 51    | 10      | 21   | 10      | 10   | 10   | 10   | 29     | 10              |
|             | 10                                                              | 10   | 10    | 10      | 10   | 10      | 10   | 10   | 10   | 36     | 10              |
|             | 35                                                              | 41   | 26    | 10      | 34   | 10      | 10   | 10   | 10   | 39     | 21              |
|             | 33                                                              | 39   | 26    | 10      | 10   | 10      | 10   | 10   | 10   | 50     | 10              |
| C.089       | 53                                                              | 57   | 45    | 33      | 42   | 27      | 23   | 10   | 10   | 59     | 10              |
|             | 289                                                             | 540  | 540   | 40      | 216  | 58      | 38   | 39   | 10   | 39     | 10              |
|             | 283                                                             | 512  | 540   | 50      | 222  | 90      | 64   | 96   | 49   | 88     | 30              |
|             | 74                                                              | 461  | 154   | 25      | 78   | 29      | 26   | 10   | 10   | 78     | 22              |
| C.1086      | 225                                                             | 460  | 111   | 37      | 93   | 38      | 98   | 80   | 31   | 72     | 29              |
|             | 295                                                             | 412  | 423   | 136     | 145  | 89      | 133  | 140  | 69   | 92     | 25              |
|             | 136                                                             | 241  | 163   | 120     | 85   | 46      | 36   | 72   | 10   | 121    | 22              |
|             | 412                                                             | 540  | 540   | 117     | 211  | 117     | 218  | 161  | 89   | 123    | 38              |
|             | 10                                                              | 10   | 10    | 10      | 10   | 92      | 10   | 10   | 10   | 10     | 30              |
|             | 10                                                              | 23   | 102   | 81      | 10   | 82      | 10   | 10   | 10   | 73     | 20              |
|             | 10                                                              | 10   | 10    | 10      | 10   | 117     | 10   | 10   | 10   | 56     | 23              |
| 10          | 36                                                              | 130  | 10    | 33      | 121  | 10      | 10   | 10   | 58   | 10     |                 |
| A.00MSA     | 31                                                              | 28   | 47    | 30      | 33   | 24      | 10   | 10   | 33   | 10     | 36              |
|             | 30                                                              | 26   | 33    | 34      | 24   | 20      | 10   | 10   | 32   | 10     | 20              |
|             | 23                                                              | 10   | 10    | 10      | 10   | 10      | 10   | 10   | 23   | 10     | 33              |
|             | 28                                                              | 21   | 42    | 10      | 44   | 40      | 10   | 10   | 49   | 21     | 62              |
| AE.97CNGX2F | 10                                                              | 40   | 21    | 10      | 10   | 10      | 10   | 10   | 10   | 10     | 30              |
|             | 10                                                              | 124  | 29    | 74      | 62   | 74      | 10   | 10   | 63   | 10     | 50              |
|             | 10                                                              | 76   | 28    | 54      | 10   | 65      | 10   | 10   | 63   | 24     | 39              |
|             | 27                                                              | 60   | 28    | 47      | 38   | 31      | 10   | 10   | 29   | 10     | 35              |

|          |    |    |    |    |    |     |    |    |    |     |     |
|----------|----|----|----|----|----|-----|----|----|----|-----|-----|
|          | 10 | 10 | 10 | 22 | 27 | 10  | 22 | 10 | 24 | 39  | 24  |
|          | 10 | 10 | 10 | 10 | 10 | 22  | 10 | 10 | 10 | 39  | 25  |
| B.JRFL   | 10 | 10 | 10 | 10 | 10 | 10  | 10 | 10 | 10 | 32  | 25  |
|          |    |    |    |    |    | 25  |    |    |    |     |     |
|          |    |    |    |    |    | 18  |    |    |    |     |     |
|          |    |    |    |    |    | 32  |    |    |    |     |     |
|          |    |    |    |    |    | 35  |    |    |    |     |     |
| C.DU123  | 10 | 37 | 10 | 10 | 20 | 10  | 10 | 10 | 10 | 44  | 34  |
|          | 10 | 53 | 10 | 10 | 40 | 10  | 10 | 10 | 10 | 46  | 46  |
|          | 10 | 65 | 10 | 10 | 57 | 10  | 10 | 10 | 10 | 49  | 64  |
|          | 10 | 61 | 10 | 10 | 49 | 10  | 10 | 10 | 10 | 61  | 62  |
| G.DRCBL  | 29 | 34 | 26 | 33 | 31 | 28  | 10 | 10 | 22 | 27  | 32  |
|          | 34 | 96 | 22 | 39 | 26 | 40  | 10 | 10 | 59 | 24  | 31  |
|          | 10 | 92 | 29 | 94 | 65 | 80  | 10 | 10 | 73 | 26  | 49  |
|          | 10 | 35 | 24 | 37 | 31 | 27  | 10 | 10 | 28 | 26  | 47  |
| A1.CON   | 10 | 10 | 10 | 10 | 10 | 57  | 10 | 10 | 10 | 170 | 87  |
|          | 10 | 10 | 28 | 21 | 10 | 169 | 24 | 20 | 10 | 181 | 100 |
|          | 21 | 10 | 10 | 10 | 10 | 134 | 10 | 10 | 10 | 261 | 56  |
|          | 10 | 10 | 10 | 10 | 10 | 137 | 10 | 10 | 10 | 218 | 96  |
| AE.CON   | 48 | 27 | 52 | 52 | 30 | 29  | 10 | 10 | 30 | 10  | 30  |
|          | 37 | 10 | 44 | 63 | 10 | 65  | 22 | 10 | 38 | 10  | 10  |
|          | 29 | 10 | 59 | 44 | 40 | 25  | 28 | 10 | 34 | 28  | 31  |
|          | 38 | 10 | 31 | 52 | 10 | 30  | 10 | 10 | 32 | 10  | 37  |
| B.CON.01 | 10 | 33 | 10 | 10 | 10 | 30  | 10 | 69 | 10 | 49  | 71  |
|          | 20 | 32 | 10 | 10 | 10 | 33  | 22 | 49 | 35 | 53  | 78  |
|          | 10 | 27 | 10 | 27 | 10 | 27  | 10 | 10 | 10 | 46  | 48  |
|          | 10 | 33 | 10 | 10 | 10 | 26  | 10 | 23 | 10 | 44  | 63  |
| B.CON 03 | 22 | 33 | 23 | 10 | 10 | 22  | 10 | 10 | 27 | 36  | 24  |
|          | 37 | 74 | 44 | 44 | 54 | 27  | 10 | 10 | 50 | 105 | 31  |
|          | 46 | 97 | 39 | 10 | 76 | 66  | 10 | 10 | 41 | 59  | 36  |
|          | 24 | 59 | 35 | 25 | 10 | 10  | 10 | 10 | 30 | 88  | 26  |
| C.CON    | 10 | 10 | 10 | 10 | 10 | 168 | 10 | 10 | 10 | 149 | 36  |
|          | 10 | 10 | 10 | 10 | 10 | 229 | 10 | 10 | 10 | 138 | 74  |
|          | 10 | 10 | 10 | 10 | 10 | 98  | 10 | 10 | 10 | 76  | 63  |
|          | 10 | 10 | 10 | 10 | 10 | 170 | 10 | 10 | 10 | 110 | 74  |
| G.CON    |    | 37 |    | 10 | 39 | 40  |    |    | 10 | 30  | 44  |
|          |    | 35 |    | 10 | 39 | 43  |    |    | 10 | 30  | 50  |
|          |    | 44 |    | 10 | 49 | 20  |    |    | 10 | 42  | 59  |
|          | 10 | 28 | 10 | 10 | 33 | 31  | 10 | 10 | 10 | 43  | 44  |
| CON-S    | 10 | 10 | 10 | 10 | 10 | 53  | 10 |    |    | 62  | 42  |
|          | 10 | 10 | 10 | 10 | 10 | 118 | 10 |    | 10 | 107 | 51  |
|          | 10 | 10 | 10 | 10 | 10 | 51  | 10 |    |    | 122 | 52  |
|          | 10 | 10 | 10 | 10 | 10 | 112 | 10 |    |    | 115 | 36  |
| CON-T    | 22 | 10 | 10 | 10 | 10 | 151 | 10 | 10 | 10 | 58  | 28  |
|          | 10 | 10 | 10 | 10 | 10 | 130 | 10 | 10 | 10 | 57  | 23  |



|    |    |    |    |    |     |    |    |    |    |    |
|----|----|----|----|----|-----|----|----|----|----|----|
| 10 | 10 | 10 | 10 | 10 | 106 | 26 | 36 | 10 | 33 | 22 |
| 10 | 10 | 10 | 10 | 10 | 126 | 30 | 73 | 10 | 39 | 36 |

---

<sup>1</sup> Serum neutralization titers were listed for post immunization sera. When neutralization titer was undetectable at the highest serum concentration tested (1:20), It was score as <20. The value 10 was assigned for data analysis purpose for samples with neutralization titer at <20.
